# Supplementary material for: Population Genetics of Nosema apis and Nosema ceranae: One Host (Apis mellifera) and Two Different Histories
Source: PLoS One. 2015 Dec 31;10(12):e0145609. doi: 10.1371/journal.pone.0145609 (PMC4699903; doi:10.1371/journal.pone.0145609)
Supplement: S8 Table — (XLS) [file pone.0145609.s009.xls]

## Sheet: Folla1
S8 Table. Meiotic genes in different microsporidian species.
Gene	E. cuniculi	E. bieneusi	N. bombycis	N. ceranae	N. apis
Spo11	NP_584795	XP_001827908	EOB14275	KKO75414	-
Rad50	NP_585989	XP_002649736	EOB14731	KKO75931	EQB60228, EQB60229, EQB60150
Mre11	NP_597471	XP_001827857	EOB11973	KKO75755	EQB60527, EQB60529
Dmc1	−	−	−	KKO75157	EQB60630
Rad51	NP_586388	XP_001828021	EOB11895	KKO74715	EQB60701
Msh4	NP_597565	XP_002649462	EOB12711	KKO75589	EQB60089
Msh5	−	−	−	−	−
Hop1	NP_584614	−	EOB12410.1	KKO74277	EQB60333
Hop2	−	−	−	−	−
Mnd1	NP_586277	XP_002650892	EOB15285	KKO75147	EQB61845, EQB62100
Rad52/22	XP_955647	−	EOB11722	KKO74609	EQB61613
Msh2	NP_597565	XP_002649462	EOB11482	KKO75589	EQB60089
Msh6	NP_586186	XP_002649625	EOB11713	KKO76117	EQB60089
Mlh1	NP_597370	XP_002650338	EOB15400	KKO76668	EQB61198
Mlh2	−	−	−	−	−
Mlh3	−	−	−	−	−
Pms1	NP_586432	XP_002650338	EOB11797	KKO74751	EQB60353
Mer3	−	−	−	−	−
Smc1	NP_584776	XP_002649733	EOB14663	KKO76340	−
Smc2	XP_965954	XP_002649437	EOB14531	KKO76727	EQB59843
Smc3	XP_955745	XP_002649509	EOB12378	KKO74700	EQB60687, EQB61185
Smc4	NP_585996	XP_002649744	EOB14726	KKO76340	−
Smc5	NP_586506	XP_002649510	EOB15516	KKO74539	EQB60647
Rad18	NP_585967	XP_001828090	EOB12092	KKO76585	EQB62173
Rad21	−	−	EOB13414	KKO75130	EQB61545
Rec8	NP_584822	XP_002649583	EOB15330	KKO74686	EQB60038
Pds5	−	−	−	−	−
Scc3	−	−	−	−	−
